# Supplementary material for: γ-Tubulin interacts with E2FA, E2FB and E2FC transcription factors, regulates proliferation and endocycle in Arabidopsis
Source: Oxford University Press journal article supplement (doi:10.1093/jxb/erz498), 2019-11-05
Supplement: erz498_suppl_supplementary_figures_s1-s5.pdf [file erz498_suppl_supplementary_figures_s1-s5.pdf]

## Supplementary Figures, Kallai et al., 2019

MPREIITLQVGQCGNQIGMEFWKQLCLEHGISKDGILED FATQGGDRKDVFFYQADDQHYP RALLIDLE 70  
PRVINGIQNGDYRNLYNHENIFVADHGGGAGNNWASGYHQGKGV EEEIMDMIDREADGSDSLEGFV LCHS 140  
IAGGTGSGMGSYLLET LNDRYSKKLVTYSVFPNQMETSDVVVQPYNSLLTLKRLTLNADCVVLDNTAL 210  
GRIAVERLHLTNPTFAQTNSLVSTVMSASTTT LRYPGYMNDLVGLLASLIPTPRCHFLMTGYTPLTVER 280  
QANVIRKTTVLDVMRRL LQTKNIMVSSYARNKEASQAKYISILNIIQGEVDPTQVHESLQRIRERKLVNF 350  
IEWGPASIQVALSKKSPYVQTAHRVSG LMLASHTSIRHLFSKCLSQYDKLRKKQAFLDNYRKFPMFADND 420  
LSEFDES RDIIESLVDEYKACESPDYIKWGMEDPEQLMTGEGNASGVVDPK LAF 474

**Fig. S1** Protein sequence of Arabidopsis  $\gamma$ -tubulin (At3g61650) with marked nuclear localization signal NLS (Hoog et al., 2011) at C terminus and nuclear export signal NES annotated by ELM database (ELM 2016-data update and new functionality of the eukaryotic linear motif resource).

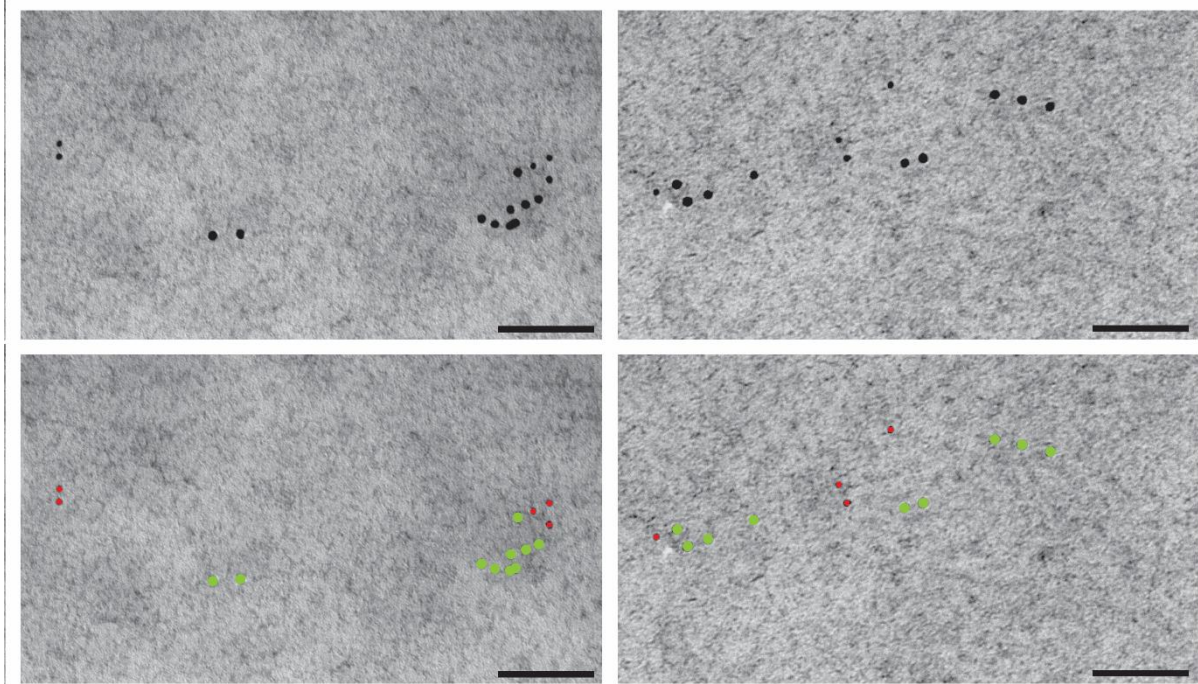

**Fig. S2** Ultrastructural immunolocalization of gamma-tubulin and GFP-EF2 in nuclei of *A.thaliana* root meristem cells – high magnification of the area in the nucleoplasm shown in Fig. 4 C, E. In the bottom row, gold particles are color-coded. Small gold particles 6 nm (red) – GFP, large gold particles 12 nm (green) – gamma tubulin (left column: DQ-19; right column: Ath). Bar: 100 nm.

A)

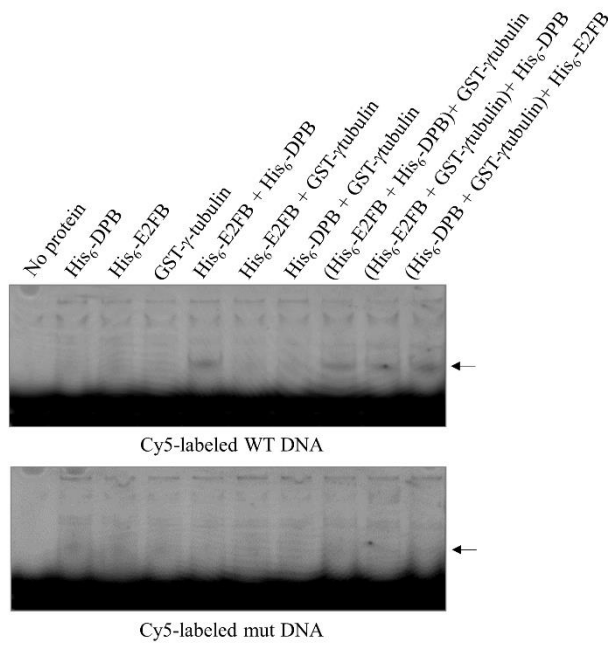

B)

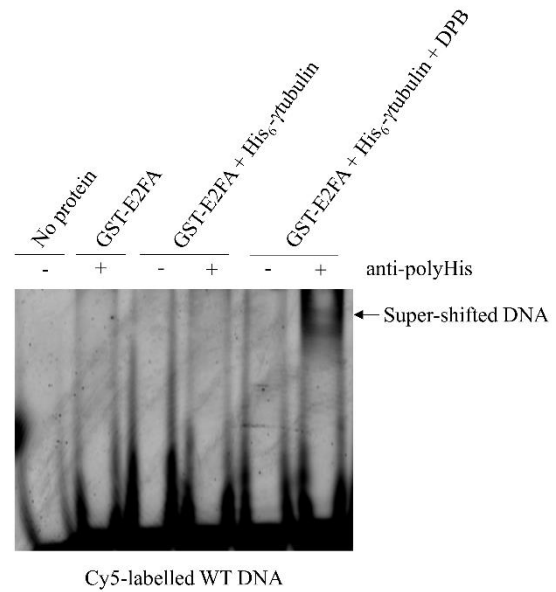

**Fig. S3** (A) Analysis of the DNA binding capacity of different combinations of His<sub>6</sub>-E2FB, His<sub>6</sub>-DPB and GST-γ-tubulin mixtures by Electrophoretic Mobility Shift Assay. Cy5 labelled wild type and mutated E2F-binding site possessing DNA was added to the protein of interest expressing wheat-germ translation mixtures and analysed by EMSA. The position of shifted band is marked by arrow.

(B) Demonstration of DNA binding capacity of heterotrimer. GST-E2FA, DPB and GST-γ-tubulin containing translation mixtures and DNA were mixed in the indicated combinations and completed with polyHis antibody. The samples were analysed by EMSA. The position of super-shifted band is marked by arrow.

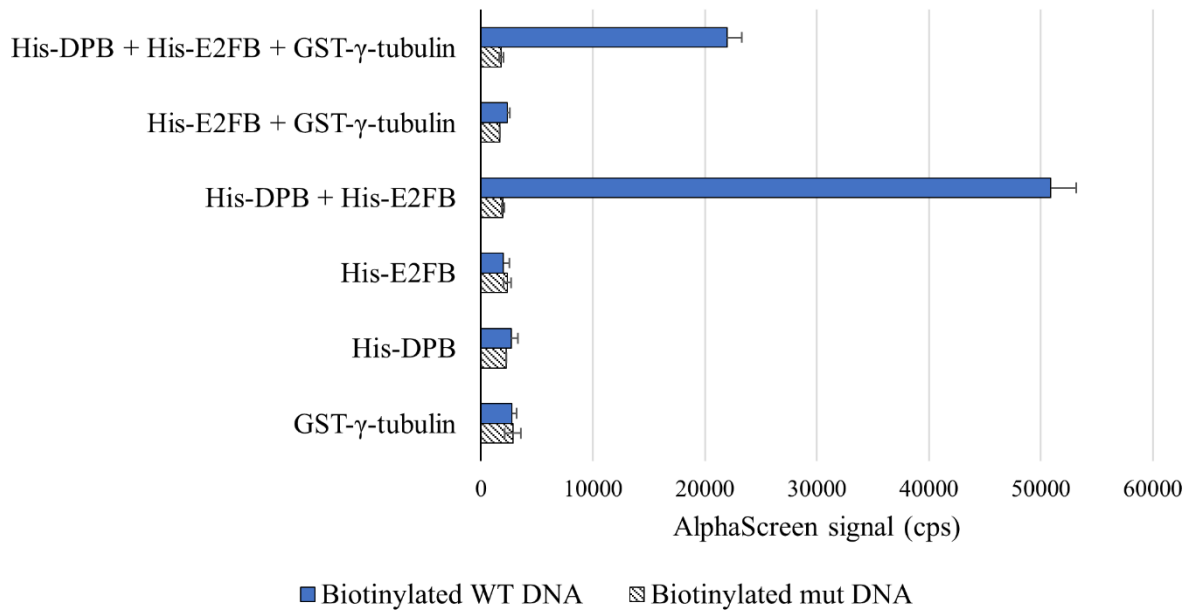

**Fig. S4** Analysis of the DNA binding capacity of different combinations of His<sub>6</sub>-E2FB, His<sub>6</sub>-DPB, and GST- $\gamma$ -tubulin by ALPHA. Biotinylated wild type and mutated E2F-binding site possessing DNA were added to various combinations of the wheat-germ translation mixtures and the samples were completed with AlphaScreen Streptavidin Donor and Nickel chelate Acceptor beads. The ALPHA signal is measured in counts per second (cps).

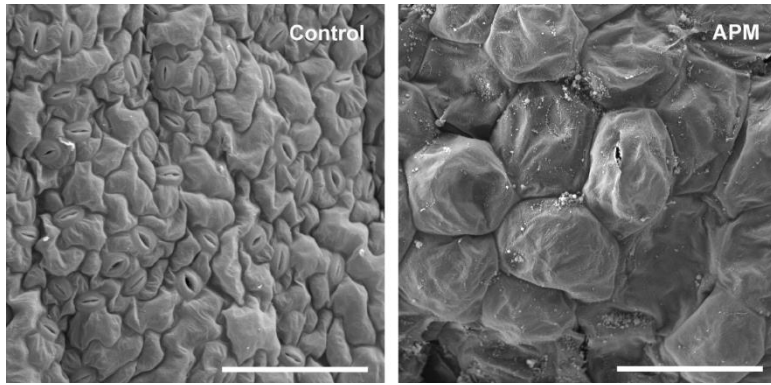

**Fig. S5** Representative SEM images of leaf of WT (Col-0) Arabidopsis plant (11 das) grown either without (Control) or with microtubule depolymerizing drug APM (10  $\mu$ M). Bars: 100  $\mu$ m.
