# Supplementary material for: γ-Tubulin interacts with E2FA, E2FB and E2FC transcription factors, regulates proliferation and endocycle in Arabidopsis
Source: Oxford University Press journal article supplement (doi:10.1093/jxb/erz498), 2019-11-05
Supplement: erz498_suppl_supplementary_tables_s1-s3.pdf [file erz498_suppl_supplementary_tables_s1-s3.pdf]

**Kallai et al., 2019**

Table S1. List of primers (5'-3')

|                                     |                                 |                                 |
|-------------------------------------|---------------------------------|---------------------------------|
| pArt27:TubG1-RNAi construction      |                                 |                                 |
| <i>TubG1</i> (AT3G61650) sense      | GACTCGAGGGTGGTCTGGTAATAACTG     | TCGGTACCCTGGCGCTCAACAGTC        |
| <i>TubG1</i> (AT3G61650) antisense  | GATCTAGAGGTGGTCTGGTAATAACTG     | TCAAGCTTCCTGGCGCTCAACAGTC       |
|                                     |                                 |                                 |
| pgE2FB-GFP construction             |                                 |                                 |
| E2FB (AT5G2220) promoter            | AAG AGA TCC AAG TGT CTG CAT TCA | AAG AAC GAA TCT CGA TAA AAA ATC |
| E2FB (AT5G2220) gene                | ATG TCT GAA GAA GTA CCT C       | GCT ACC TGT AGG TGA TCT CGT AGC |
|                                     |                                 |                                 |
| pgE2FC-GFP construction             |                                 |                                 |
| E2FC (AT1G47870) promoter           | AAT AGT CAT AAG CAT ATA GTA     | GTA ACG GCG GTG TAT CTC CGG TGG |
| E2FC (AT1G47870) gene               | ATG GCC GCG ACA TCA AAC TCA GGC | GCT GTT GAA GTT GCT CCA TAA ATC |
|                                     |                                 |                                 |
| qRT-PCR                             |                                 |                                 |
| <i>ORC2</i> (AT2G37560)             | TCCCGAATCACAACAAACTC            | CCACAATAATGGAGGTTGA             |
| <i>CYCD3;1</i> (AT4G34160)          | GCAGCATAAGTTCAGTGTGTAGC         | AAACCGTAAGAGGCAGCTCTGG          |
| <i>CDKB1;1</i> (AT3G54180)          | TCTGTTGGTTGTATCTTTGCTGA         | CATTGCTGCTCAGTTGGTGT            |
| <i>RBR</i> (AT3G12280)              | CGCTTCCATTTTGGTTTTGA            | TGAACAACAGCAGCAGCAAC            |
| <i>PCNA1</i> (AT1G07370)            | AACCGCTAACATTGTGCTCAGG          | TCACAATTGCATCTCCGGCTTG          |
| <i>CCS52A2</i> (AT4G11920)          | CGTGAGAATGCAAAGATGAGA           | TGAAACGCAGATCACACAAA            |
|                                     |                                 |                                 |
| Chromatin Immunoprecipitation       |                                 |                                 |
| <i>CDKB1;1</i> E2F site (AT3G54180) | CACAGAGGTCACGACTTTAGG           | CGCTAAGATACTTCCACGTAC           |
| <i>CDKB1;1</i> upstream (AT3G54180) | GCTTGCTATGTTTGTGTGG             | AGTTCGCGTTTTGAGACTT             |
| <i>CycD3;1</i> E2F site (AT4G34160) | AGCCGACAGATTTTACTGCA            | TTTCTTTGCTGTTTCCCGC             |
| <i>CycD3;1</i> upstream (AT4G34160) | GGTATCCTCCTCAGCCATCT            | ATGGTTGAGGAGGGTAAGCT            |
| <i>CENH3</i> E2F site (AT1G01370)   | AAATTTGAGTGTGAGCGGG             | CTGCTGAGAAATTTCCCGCT            |
| <i>PCNA1</i> E2F site (AT1G07370)   | AATGACCAAAAATATCCATCCAA         | CGGCTATTTTGAAAGTGGA             |

Table S2. List of primers used for the construction of truncated E2F proteins. Underlined letters represent the start and stop codons, bold letters the gene-specific sequences. The calculated molecular weights of the truncated proteins are shown in kDa.

| Name    | Primers |                                                                | kDa  |
|---------|---------|----------------------------------------------------------------|------|
| E2FAΔDD | forward | 5' - TACTTCCAATCCAATGCAATG <u>TCCGGTGT</u> <b>CGTACGA</b> -3'  | 25.2 |
|         | reverse | 5' - TTATCCACTTCCAATGTCA <u>TCCCTTCCAAAGTATTCGATTCTTGA</u> -3' |      |
| E2FBΔDD | forward | 5' - TACTTCCAATCCAATG <b>CAATGTCTGAAGAAGTACCT</b> -3'          | 20.9 |
|         | reverse | 5' - TTATCCACTTCCAATGTCA <b>ACCCTTCCACTGAATCCTGTTT</b> -3'     |      |
| E2FCΔDD | forward | 5' - TACTTCCAATCCAATG <b>CAATGGCCGCGACATCAAAC</b> -3'          | 25.7 |
|         | reverse | 5' - TTATCCACTTCCAATGTCA <b>CACCCTTCCAGCGGATATGAT</b> -3'      |      |

Table S3. List of wild-type proteins translated by wheat-germ *in vitro* translation. The molecular weights of the wild-type proteins are shown in kDa. The proteins were translated by wheat-germ *in vitro* translation as fusion proteins with GST-tag and His<sub>6</sub>-tag, of approximately 26 kDa and 1 kDa, respectively.

| AGI         | Protein name      | Calculated protein size without tag (kDa) |
|-------------|-------------------|-------------------------------------------|
| AT2G36010.3 | E2FA              | 52.8                                      |
| AT5G22220.2 | E2FB              | 51.7                                      |
| AT1G47870.1 | E2FC              | 44.5                                      |
| AT5G02470.1 | DPA               | 33.0                                      |
| AT5G03415.1 | DPB               | 42.8                                      |
| AT3G61650.1 | $\gamma$ -tubulin | 53.2                                      |
| AT5G14750.1 | MYB66             | 23.6                                      |
